# Supplementary material for: RBP-Maps enables robust generation of splicing regulatory maps
Source: RNA. 2019 Feb;25(2):193–204. doi: 10.1261/rna.069237.118 (PMC6348990; doi:10.1261/rna.069237.118)
Supplement: Supplemental Material [file supp_069237.118_Supplemental_Table_S1.xlsx]

## Sheet: Sheet1
RBP	Cell Line	Knockdown RNA-seq accession	eCLIP accession
AARS	K562	ENCSR599UDS	ENCSR825SVO
AATF	K562	ENCSR973QSV	ENCSR819XBT
ABCF1	K562	ENCSR721MXZ	ENCSR089BXO
AGGF1	HepG2	ENCSR437GYG	ENCSR543TPH
AGGF1	K562	ENCSR812TLY	ENCSR725ARB
AKAP1	HepG2	ENCSR016IDR	ENCSR356ZMO
AKAP1	K562	ENCSR338CON	ENCSR177QQY
AKAP8L	K562	ENCSR809ISU	ENCSR206RXT
APOBEC3C	K562	ENCSR963RLK	ENCSR739VVT
AQR	K562	ENCSR624OUI	ENCSR606BPV
BCCIP	HepG2	ENCSR570CWH	ENCSR485QCG
BCLAF1	HepG2	ENCSR481AYC	ENCSR876EYA
BUD13	HepG2	ENCSR382QKD	ENCSR830BSQ
BUD13	K562	ENCSR267RHP	ENCSR663WES
CDC40	HepG2	ENCSR278NFF	ENCSR815VVI
CPEB4	K562	ENCSR795VAK	ENCSR046JHH
CPSF6	K562	ENCSR384BDV	ENCSR532VUB
CSTF2	HepG2	ENCSR815JDY	ENCSR384MWO
CSTF2T	HepG2	ENCSR914WQV	ENCSR919HSE
CSTF2T	K562	ENCSR286OKW	ENCSR840DRD
DDX21	K562	ENCSR384LKC	ENCSR040QLV
DDX24	K562	ENCSR067LLB	ENCSR999WKT
DDX3X	HepG2	ENCSR637JLM	ENCSR648LAH
DDX3X	K562	ENCSR000KYM	ENCSR930BZL
DDX51	K562	ENCSR029LGJ	ENCSR145NLR
DDX52	HepG2	ENCSR913ZWR	ENCSR970FEW
DDX52	K562	ENCSR560RSZ	ENCSR154CSN
DDX55	HepG2	ENCSR964YTW	ENCSR845VGB
DDX55	K562	ENCSR856CJK	ENCSR923NKN
DDX59	HepG2	ENCSR598GKQ	ENCSR214BZA
DDX6	HepG2	ENCSR147ZBD	ENCSR141OIM
DDX6	K562	ENCSR119QWQ	ENCSR893EFU
DHX30	HepG2	ENCSR853PBF	ENCSR565DGW
DHX30	K562	ENCSR345VVZ	ENCSR529GSJ
DKC1	HepG2	ENCSR118KUN	ENCSR301TFY
DROSHA	HepG2	ENCSR991XFO	ENCSR834YLD
DROSHA	K562	ENCSR624XHG	ENCSR653HQC
EFTUD2	HepG2	ENCSR620OKS	ENCSR527DXF
EFTUD2	K562	ENCSR117WLY	ENCSR844RVX
EIF3D	HepG2	ENCSR788HVK	ENCSR041NUV
EIF3G	K562	ENCSR143UET	ENCSR023PKW
EIF3H	HepG2	ENCSR964YLV	ENCSR916XIV
EIF4G2	K562	ENCSR040FSN	ENCSR307YIW
EWSR1	K562	ENCSR831YGP	ENCSR887LPK
EXOSC5	HepG2	ENCSR284SZO	ENCSR693JWP
EXOSC5	K562	ENCSR406SEH	ENCSR013CTQ
FAM120A	HepG2	ENCSR047VPW	ENCSR987NYS
FAM120A	K562	ENCSR492BKM	ENCSR006OEQ
FASTKD2	HepG2	ENCSR716WZH	ENCSR023UHL
FASTKD2	K562	ENCSR608IAI	ENCSR887FHF
FKBP4	HepG2	ENCSR639LKS	ENCSR018ZUE
FMR1	K562	ENCSR555LCE	ENCSR331VNX
FTO	HepG2	ENCSR389HFU	ENCSR903PRV
FTO	K562	ENCSR688GVV	ENCSR989SMC
FUBP3	HepG2	ENCSR755KOM	ENCSR486YGP
FUS	HepG2	ENCSR927JXU	ENCSR464OSH
FUS	K562	ENCSR325OOM	ENCSR069EVH
FXR1	K562	ENCSR780YFF	ENCSR774RFN
FXR2	K562	ENCSR376GHG	ENCSR224QWC
G3BP1	HepG2	ENCSR074UZM	ENCSR721HPX
GEMIN5	K562	ENCSR398GHW	ENCSR238CLX
GPKOW	K562	ENCSR967QNT	ENCSR647CLF
GRSF1	HepG2	ENCSR674KDQ	ENCSR668MJX
GRWD1	HepG2	ENCSR850FEH	ENCSR893NWB
GRWD1	K562	ENCSR528ASX	ENCSR999YGP
GTF2F1	HepG2	ENCSR295XKC	ENCSR265ZIS
GTF2F1	K562	ENCSR188IPO	ENCSR736AAG
HLTF	HepG2	ENCSR010ZMZ	ENCSR647HOX
HLTF	K562	ENCSR958NDU	ENCSR589YHM
HNRNPA1	HepG2	ENCSR182DAW	ENCSR769UEW
HNRNPA1	K562	ENCSR048BWH	ENCSR154HRN
HNRNPC	HepG2	ENCSR052IYH	ENCSR550DVK
HNRNPC	K562	ENCSR634KBO	ENCSR249ROI
HNRNPK	HepG2	ENCSR853ZJS	ENCSR828ZID
HNRNPK	K562	ENCSR529JNJ	ENCSR268ETU
HNRNPL	HepG2	ENCSR155BMF	ENCSR724RDN
HNRNPL	K562	ENCSR563YIS	ENCSR795CAI
HNRNPM	HepG2	ENCSR995JMS	ENCSR267UCX
HNRNPM	K562	ENCSR746NIM	ENCSR412NOW
HNRNPU	HepG2	ENCSR308IKH	ENCSR240MVJ
HNRNPU	K562	ENCSR047IUS	ENCSR520BZQ
HNRNPUL1	HepG2	ENCSR689ZJC	ENCSR755TJC
HNRNPUL1	K562	ENCSR034VBA	ENCSR571VHI
IGF2BP1	HepG2	ENCSR268XHM	ENCSR744GEU
IGF2BP1	K562	ENCSR543LCG	ENCSR975KIR
IGF2BP2	K562	ENCSR952RRH	ENCSR062NNB
IGF2BP3	HepG2	ENCSR710NWE	ENCSR993OLA
ILF3	HepG2	ENCSR942MBU	ENCSR786TSC
ILF3	K562	ENCSR269HQA	ENCSR438KWZ
KHDRBS1	K562	ENCSR023HWI	ENCSR628IDK
KHSRP	HepG2	ENCSR850CKU	ENCSR366DGX
KHSRP	K562	ENCSR561CBC	ENCSR438GZQ
LARP4	HepG2	ENCSR744PAQ	ENCSR805SRN
LARP4	K562	ENCSR866XLI	ENCSR888YTT
LARP7	HepG2	ENCSR624FBY	ENCSR961OKA
LARP7	K562	ENCSR770OWW	ENCSR456KXI
LIN28B	HepG2	ENCSR927SLP	ENCSR861GYE
LIN28B	K562	ENCSR598YQX	ENCSR970NKP
LSM11	HepG2	ENCSR883BXR	ENCSR135VMS
LSM11	K562	ENCSR762FEO	ENCSR022BVV
MATR3	HepG2	ENCSR492UFS	ENCSR290VLT
MATR3	K562	ENCSR792XFP	ENCSR440SUX
METAP2	K562	ENCSR952QDQ	ENCSR303OQD
MTPAP	K562	ENCSR631RFX	ENCSR200DKE
NCBP2	HepG2	ENCSR030ARO	ENCSR018RVZ
NCBP2	K562	ENCSR361LBE	ENCSR484LTQ
NIP7	HepG2	ENCSR696LLZ	ENCSR361OCV
NKRF	HepG2	ENCSR517JDK	ENCSR277DEO
NOL12	HepG2	ENCSR643UFV	ENCSR820DQJ
NOLC1	HepG2	ENCSR959HPB	ENCSR194HZU
NONO	K562	ENCSR398HXV	ENCSR861PAR
NPM1	K562	ENCSR346DZQ	ENCSR867DSZ
NSUN2	K562	ENCSR829EFL	ENCSR081JYH
PABPC4	K562	ENCSR047EEG	ENCSR958FKZ
PCBP1	HepG2	ENCSR635FRH	ENCSR256CHX
PCBP1	K562	ENCSR545AIK	ENCSR922WJV
PCBP2	HepG2	ENCSR028ITN	ENCSR339FUY
PHF6	K562	ENCSR322XVS	ENCSR001KKZ
PPIG	HepG2	ENCSR620HAA	ENCSR097NEE
PPIL4	K562	ENCSR556FNN	ENCSR197INS
PRPF4	HepG2	ENCSR215FRI	ENCSR977OXG
PRPF8	HepG2	ENCSR998MZP	ENCSR121NVA
PRPF8	K562	ENCSR137HKS	ENCSR534YOI
PTBP1	HepG2	ENCSR064DXG	ENCSR384KAN
PTBP1	K562	ENCSR527IVX	ENCSR981WKN
PUM1	K562	ENCSR745WVZ	ENCSR308YNT
PUM2	K562	ENCSR118XYK	ENCSR661ICQ
PUS1	K562	ENCSR618IQH	ENCSR291XPT
QKI	HepG2	ENCSR330YOU	ENCSR570WLM
QKI	K562	ENCSR256PLH	ENCSR366YOG
RBFOX2	HepG2	ENCSR767LLP	ENCSR987FTF
RBFOX2	K562	ENCSR336DFS	ENCSR756CKJ
RBM15	HepG2	ENCSR599PXD	ENCSR754NDA
RBM15	K562	ENCSR385UPQ	ENCSR196INN
RBM22	HepG2	ENCSR330KHN	ENCSR456JJQ
RBM22	K562	ENCSR947OIM	ENCSR295OKT
RBM5	HepG2	ENCSR606PVX	ENCSR489ABS
RPS3	K562	ENCSR642GBC	ENCSR120EAR
SAFB2	K562	ENCSR770LYW	ENCSR943MHU
SBDS	K562	ENCSR219DXZ	ENCSR059CWF
SERBP1	K562	ENCSR925RNE	ENCSR121GQH
SF3A3	HepG2	ENCSR374NMJ	ENCSR331MIC
SF3B1	K562	ENCSR047QHX	ENCSR133QEA
SF3B4	HepG2	ENCSR148MQK	ENCSR279UJF
SF3B4	K562	ENCSR081XRA	ENCSR267OLV
SFPQ	HepG2	ENCSR782MXN	ENCSR965DLL
SLBP	K562	ENCSR112YTD	ENCSR483NOP
SLTM	HepG2	ENCSR185JGT	ENCSR351PVI
SLTM	K562	ENCSR234YMW	ENCSR000SSH
SMNDC1	HepG2	ENCSR995ZGJ	ENCSR373ODC
SMNDC1	K562	ENCSR408SDL	ENCSR658IQB
SND1	HepG2	ENCSR398LZW	ENCSR061EVO
SND1	K562	ENCSR232XRZ	ENCSR128VXC
SRSF1	HepG2	ENCSR094KBY	ENCSR989VIY
SRSF1	K562	ENCSR066VOO	ENCSR432XUP
SRSF7	HepG2	ENCSR845MNM	ENCSR513NDD
SRSF7	K562	ENCSR139LOF	ENCSR468FSW
SRSF9	HepG2	ENCSR597XHH	ENCSR773KRC
SSB	HepG2	ENCSR278CHI	ENCSR352STY
SSB	K562	ENCSR891AXF	ENCSR356MSW
SUB1	HepG2	ENCSR997FOT	ENCSR406OOZ
SUGP2	HepG2	ENCSR837QDN	ENCSR506UPY
SUPV3L1	HepG2	ENCSR995RPB	ENCSR580MFX
SUPV3L1	K562	ENCSR778SIU	ENCSR580OFI
TAF15	HepG2	ENCSR998RZI	ENCSR841EQA
TAF15	K562	ENCSR611ZAL	ENCSR568DZW
TARDBP	K562	ENCSR134JRE	ENCSR584TCR
TBRG4	HepG2	ENCSR741YCA	ENCSR916SRV
TBRG4	K562	ENCSR079IPT	ENCSR506OTC
TIA1	HepG2	ENCSR057GCF	ENCSR623VEQ
TIA1	K562	ENCSR694LKY	ENCSR057DWB
TIAL1	HepG2	ENCSR450VQO	ENCSR322HHA
TRA2A	HepG2	ENCSR030GZQ	ENCSR314UMJ
TRA2A	K562	ENCSR916WOI	ENCSR365NVO
TROVE2	HepG2	ENCSR946OFN	ENCSR993FMY
TROVE2	K562	ENCSR060KRD	ENCSR539ZTS
U2AF1	HepG2	ENCSR372UWV	ENCSR328LLU
U2AF1	K562	ENCSR342EDG	ENCSR862QCH
U2AF2	HepG2	ENCSR426UUG	ENCSR202BFN
U2AF2	K562	ENCSR904CJQ	ENCSR893RAV
UCHL5	HepG2	ENCSR684HTV	ENCSR490IEE
UCHL5	K562	ENCSR678MVE	ENCSR349KMG
UPF1	HepG2	ENCSR689MIY	ENCSR539BEV
UPF1	K562	ENCSR251ABP	ENCSR456ASB
UTP18	HepG2	ENCSR269ZAO	ENCSR488JKQ
UTP18	K562	ENCSR165VBD	ENCSR964VOX
UTP3	K562	ENCSR818TZM	ENCSR734ZHL
WDR3	K562	ENCSR334BTA	ENCSR202HKN
WDR43	K562	ENCSR341PZW	ENCSR349CMI
WRN	K562	ENCSR165BCF	ENCSR038JME
XPO5	HepG2	ENCSR778RWJ	ENCSR921SXC
XRCC6	HepG2	ENCSR500WHE	ENCSR571ROL
XRCC6	K562	ENCSR232CPD	ENCSR258QKO
XRN2	HepG2	ENCSR347ZHQ	ENCSR655NZA
XRN2	K562	ENCSR717SJA	ENCSR657TZB
YBX3	HepG2	ENCSR494VSD	ENCSR735HOK
YBX3	K562	ENCSR306EIU	ENCSR529FKI
ZC3H8	K562	ENCSR448JAM	ENCSR181NRW
ZRANB2	K562	ENCSR850PWM	ENCSR663NRA
SAFB	K562	ENCSR336TYW	ENCSR484LAB
ZNF800	K562	ENCSR974RYS	ENCSR586DGV
SDAD1	HepG2	ENCSR715QWM	ENCSR050BDZ
SDAD1	K562	ENCSR103NNB	ENCSR906ZJF
